# Supplementary material for: Toward understanding the adsorption mechanism of large size organic corrosion inhibitors on an Fe(110) surface using the DFTB method
Source: Royal Society of Chemistry journal article supplement (doi:10.1039/c7ra04120a), 2017-01-01
Supplement: c7ra04120a1.pdf [file c7ra04120a1.pdf]

### Supporting Information

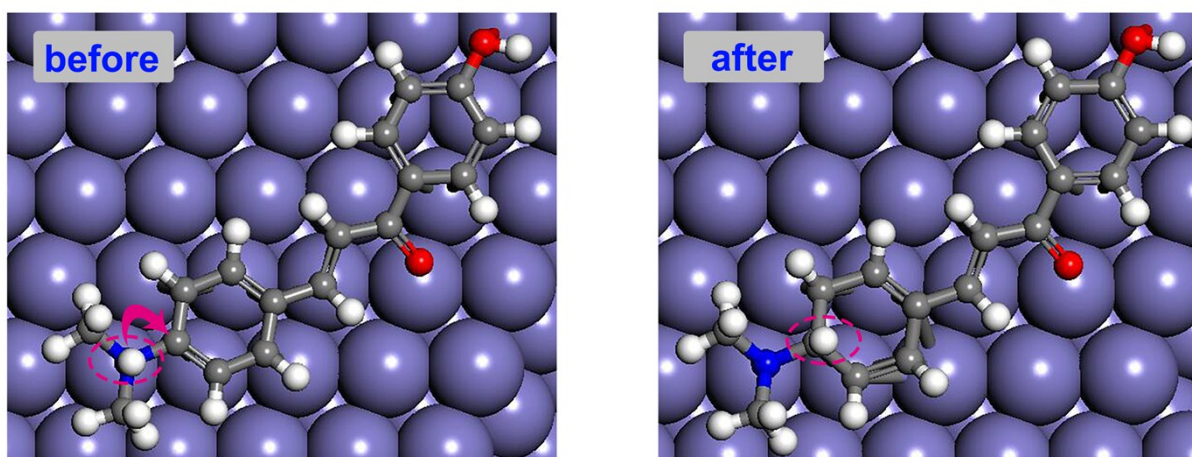

Fig. S1 Adsorption configurations of Inh3H before and after the geometry optimization.

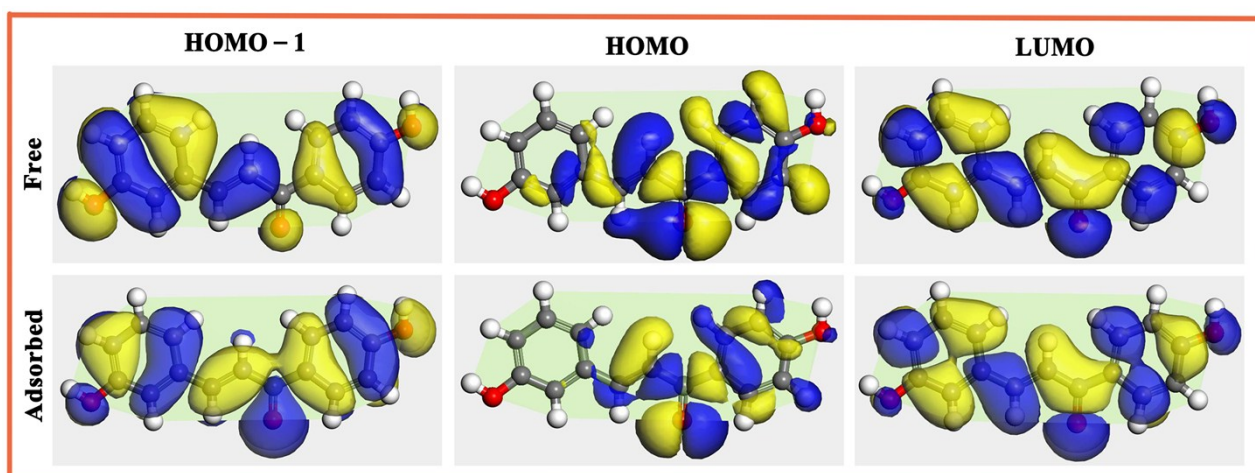

Fig. S2 Molecular orbital plots for the Inh2 molecule from the HOMO-1 to LUMO under the free (upper row) and adsorbed state (lower row).

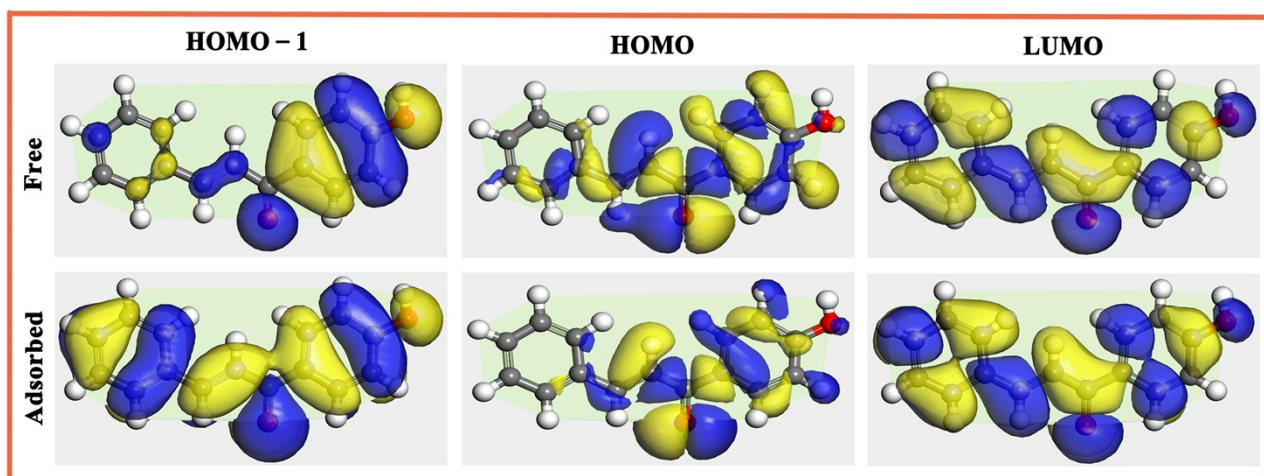

Fig. S3 Molecular orbital plots for the Inh1 molecule from the HOMO-1 to LUMO under the free (upper row) and adsorbed state (lower row).
